# Supplementary material for: Morphological, histological and transcriptomic mechanisms underlying different fruit shapes in Capsicum spp.
Source: PeerJ journal article supplement (doi:10.7717/peerj.17909), 2024-09-30

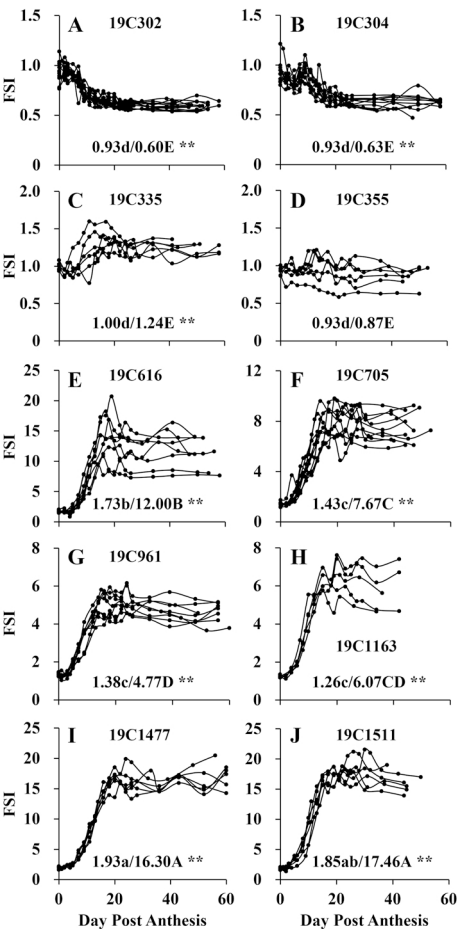

Supplement: Figure_S1.pdf [file Figure_S1.pdf]
